# Supplementary material
Source: bioRxiv or medRxiv preprint supplement (https://www.biorxiv.org/highwire/filestream/47047/field_highwire_adjunct_files/8/137695-8.pdf)
Supplement: Supplementary file [file 137695-8.pdf]

**Table S1:** *Myxococcus xanthus* strains used in this study. Related to STAR methods.

| Strains | Construction                                            | Genotype                                           | Source                 |
|---------|---------------------------------------------------------|----------------------------------------------------|------------------------|
| DZ2     | Wild type                                               | WT                                                 | Laboratory collection  |
| DZ4038  | DZ2 <i>frzon</i>                                        | <i>frzon</i>                                       | Bustamante et al. 2004 |
| DZ4481  | DZ2 $\Delta$ <i>frzE</i>                                | $\Delta$ <i>frzE</i>                               | Bustamante et al. 2004 |
| DZ4484  | DZ2 $\Delta$ <i>frzZ</i>                                | $\Delta$ <i>frzZ</i>                               | Bustamante et al. 2004 |
| DZ4833  | <i>frzZ-gfp</i>                                         | <i>frzZ-gfp</i>                                    | Kaimer et al. 2012     |
| TM3     | DZ2 <i>frzS-gfp</i>                                     | <i>frzS-yfp</i>                                    | Mignot et al. 2005     |
| TM4     | DZ2 $\Delta$ <i>frzE frzS-gfp</i>                       | $\Delta$ <i>frzE frzS-yfp</i>                      | Mignot et al. 2005     |
| TM12    | DZ2 $\Delta$ <i>mglA</i>                                | $\Delta$ <i>mglA</i>                               | Mauriello et al. 2010  |
| TM155   | DZ2 $\Delta$ <i>mglB</i>                                | $\Delta$ <i>mglB</i>                               | Zhang et al 2010       |
| TM182   | DZ4481 <i>mglA-yfp (pSWU19 mglA-yfp)</i>                | $\Delta$ <i>frzE mglA-yfp mglA</i>                 | Zhang et al 2010       |
| TM184   | DZ2 <i>mglA-yfp (pSWU30 mglA-yfp)</i>                   | <i>mglA-yfp mglA</i>                               | Zhang et al 2010       |
| TM187   | DZ4481 $\Delta$ <i>mglB</i>                             | $\Delta$ <i>frzE \Delta</i> <i>mglB</i>            | Zhang et al 2010       |
| TM192   | TM155 <i>mglB-yfp (pSWU19mglB-yfp)</i>                  | $\Delta$ <i>mglB mglB-yfp</i>                      | Zhang et al 2010       |
| TM199   | DZ4038 $\Delta$ <i>mglB</i>                             | <i>frzon \Delta</i> <i>mglB</i>                    | Zhang et al 2010       |
| TM200   | TM199 <i>mglB-yfp</i>                                   | <i>frzon \Delta</i> <i>mglB mglB-yfp</i>           | Zhang et al 2010       |
| TM254   | DZ2 $\Delta$ <i>romR</i>                                | $\Delta$ <i>romR</i>                               | Zhang et al 2012       |
| TM302   | TM184 <i>mglB-mCh</i>                                   | <i>mglA-yfp mglA mglB-mCh</i>                      | Zhang et al 2010       |
| TM844   | DZ4484 $\Delta$ <i>romR</i>                             | $\Delta$ <i>frzZ \Delta</i> <i>romR</i>            | Guzzo et al 2015       |
| TM872   | DZ4038 $\Delta$ <i>frzZ</i>                             | <i>frzon \Delta</i> <i>frzZ</i>                    | Guzzo et al 2015       |
| TM877   | DZ4484 <i>frzS-yfp</i>                                  | $\Delta$ <i>frzZ frzS-yfp</i>                      | Guzzo et al 2015       |
| TM880   | TM844 <i>frzS-yfp (pEFrzSY)</i>                         | $\Delta$ <i>frzZ \Delta</i> <i>romR frzS-yfp</i>   | Guzzo et al 2015       |
| TM648   | DZ2 <i>romRD53N (pBJ114 romRD53N)</i>                   | <i>romrD53N</i>                                    | This work              |
| TM649   | DZ2 <i>romRD53E (pBJ114 romRD53E)</i>                   | <i>romrD53E</i>                                    | This work              |
| TM858   | TM649 $\Delta$ <i>frzZ (pBJ114 \Delta</i> <i>frzZ)</i>  | <i>romRD53E \Delta</i> <i>frzZ</i>                 | This work              |
| TM871   | TM648 $\Delta$ <i>frzZ (pBJ114 \Delta</i> <i>frzZ)</i>  | <i>romRD53N \Delta</i> <i>frzZ</i>                 | This work              |
| TM907   | DZ4438 <i>frzS-yfp (pEFrzSY)</i>                        | <i>frzon frzS-yfp</i>                              | This work              |
| TM945   | TM187 <i>mglB-yfp (pSWU30 mglB-yfp)</i>                 | $\Delta$ <i>frzE \Delta</i> <i>mglB mglB-yfp</i>   | This work              |
| TM964   | DZ2 $\Delta$ <i>frzX (pBJ114 \Delta</i> <i>frzX)</i>    | $\Delta$ <i>frzX (\Delta</i> <i>MXAN_5688)</i>     | This work              |
| TM968   | DZ2 <i>romr-sfGFP (pBJ114 romr-sfgfp)</i>               | <i>romr-sfGFP</i>                                  | This work              |
| TM977   | TM968 $\Delta$ <i>frzE (pBJ114 \Delta</i> <i>frzE)</i>  | <i>romR-sfGFP \Delta</i> <i>frzE</i>               | This work              |
| TM985   | TM 964 <i>frzon</i>                                     | $\Delta$ <i>frzX frzon</i>                         | This work              |
| TM986   | TM872 $\Delta$ <i>frzX (pBJ114 \Delta</i> <i>frzX)</i>  | <i>frzon \Delta</i> <i>frzZ \Delta</i> <i>frzX</i> | This work              |
| TM987   | DZ4484 $\Delta$ <i>frzX (pBJ114 \Delta</i> <i>frzX)</i> | $\Delta$ <i>frzZ \Delta</i> <i>frzX</i>            | This work              |
| TM994   | TM964 <i>frzS-yfp (pEFrzSY)</i>                         | $\Delta$ <i>frzX frzS-yfp</i>                      | This work              |
| TM995   | TM964 <i>frzX (pSWU19 frzX)</i>                         | $\Delta$ <i>frzX frzX</i>                          | This work              |

|        |                                                            |                                                           |           |
|--------|------------------------------------------------------------|-----------------------------------------------------------|-----------|
| TM999  | TM987 <i>frzS-yfp</i> (pE <i>FrzSY</i> )                   | $\Delta$ <i>frzZ</i> $\Delta$ <i>frzX</i> <i>frzS-yfp</i> | This work |
| TM1006 | TM964 $\Delta$ <i>romR</i> (pBJ114 $\Delta$ <i>romR</i> )  | $\Delta$ <i>frzX</i> $\Delta$ <i>romR</i>                 | This work |
| TM1011 | TM968 <i>frzon</i>                                         | <i>romR-sfGFP frzon</i>                                   | This work |
| TM1021 | TM 964 <i>frzZ-gfp</i>                                     | $\Delta$ <i>frzX frzZ-gfp</i>                             | This work |
| TM1031 | TM 964 <i>mglA-yfp</i> (pSWU19 <i>mglA-yfp</i> )           | $\Delta$ <i>frzX mglA-yfp</i>                             | This work |
| TM1038 | TM 12 <i>frzZ-gfp</i>                                      | $\Delta$ <i>mglA frzZ-gfp</i>                             | This work |
| TM1040 | TM 968 $\Delta$ <i>frzX</i> (pBJ114 $\Delta$ <i>frzX</i> ) | <i>romR-sfGFP</i> $\Delta$ <i>frzX</i>                    | This work |
| TM1044 | DZ4481 <i>frzZ-gfp</i>                                     | $\Delta$ <i>frzE frzZ-gfp</i>                             | This work |
| TM1048 | TM 968 $\Delta$ <i>frzZ</i> (pBJ114 $\Delta$ <i>frzZ</i> ) | <i>romR-sfGFP</i> $\Delta$ <i>frzZ</i>                    | This work |
| TM1056 | TM 964 <i>frzXD55A</i> (pSWU19 <i>frzXD55A</i> )           | $\Delta$ <i>frzX frzXD55A</i>                             | This work |
| TM1061 | TM 964 $\Delta$ <i>mglB</i> (pBJ114 $\Delta$ <i>mglB</i> ) | $\Delta$ <i>frzX</i> $\Delta$ <i>mglB</i>                 | This work |
| TM1066 | TM 1061 <i>mglB-yfp</i> (pSWU30 <i>mglB-yfp</i> )          | $\Delta$ <i>frzX</i> $\Delta$ <i>mglB mglB-yfp</i>        | This work |
| TM1082 | TM964 <i>sfGFP-frzX</i> (pSWU19 <i>sfGFP-frzX</i> )        | $\Delta$ <i>frzX sfGFP-frzX</i>                           | This work |
| TM1089 | TM1061 <i>sfGFP-frzX</i> (pSWU19 <i>sfGFP-frzX</i> )       | $\Delta$ <i>frzX</i> $\Delta$ <i>mglB sfGFP-frzX</i>      | This work |
| TM1090 | TM1006 <i>sfGFP-frzX</i> (pSWU19 <i>sfGFP-frzX</i> )       | $\Delta$ <i>frzX</i> $\Delta$ <i>romR sfgfp-frzX</i>      | This work |
| TM1091 | TM987 <i>sfGFP-frzX</i> (pSWU19 <i>sfGFP-frzX</i> )        | $\Delta$ <i>frzZ</i> $\Delta$ <i>frzX sfgfp-frzX</i>      | This work |
| TM1094 | TM12 $\Delta$ <i>frzX</i> (pBJ114 $\Delta$ <i>frzX</i> )   | $\Delta$ <i>mglA</i> $\Delta$ <i>frzX</i>                 | This work |
| TM1095 | DZ4481 $\Delta$ <i>frzX</i> (pBJ114 $\Delta$ <i>frzX</i> ) | $\Delta$ <i>frzE</i> $\Delta$ <i>frzX</i>                 | This work |
| TM1101 | TM1094 <i>sfGFP-frzX</i> (pSWU19 <i>sfGFP-frzX</i> )       | $\Delta$ <i>mglA</i> $\Delta$ <i>frzX sfgfp-frzX</i>      | This work |
| TM1108 | TM1095 <i>sfGFP-frzX</i> (pSWU19 <i>sfGFP-frzX</i> )       | $\Delta$ <i>frzE</i> $\Delta$ <i>frzX sfgfp-frzX</i>      | This work |
| TM1129 | DZ4038 (pSWU19 <i>mglA-yfp</i> )                           | <i>frzon mglA-yfp</i>                                     | This work |
| TM1146 | TM1048 <i>frzon</i>                                        | <i>romR-sfGFP</i> $\Delta$ <i>frzZ frzon</i>              | This work |
| TM1171 | TM1082 <i>frzZ-mCh</i> (pBJ114 <i>frzZ-mCh</i> )           | $\Delta$ <i>frzX sfgfp-frzX frzZ-mCh</i>                  | This work |
| TM1179 | TM1082 <i>romR-mCh</i> (pBJ114 <i>romR-mCh</i> )           | $\Delta$ <i>frzX sfGFP-frzX romR-mCh</i>                  | This work |
| TM1203 | TM1082 <i>frzon</i>                                        | <i>frzon</i> $\Delta$ <i>frzX sfGFP-frzX</i>              | This work |
